# Supplementary material for: Mixed-matrix materials using metal–organic polyhedra with enhanced compatibility for membrane gas separation
Source: Royal Society of Chemistry journal article supplement (doi:10.1039/c8dt00082d), 2018-01-01
Supplement: c8dt00082d1.pdf [file c8dt00082d1.pdf]

## Electronic Supplementary Information (ESI)

### Mixed-matrix materials using metal-organic polyhedra with enhanced compatibility for membrane gas separation

Cressa Ria P. Fulong,<sup>a</sup> Junyi Liu,<sup>b</sup> Vincent J. Pastore,<sup>a</sup> Haiqing Lin,<sup>\*b</sup> and Timothy R. Cook<sup>\*a</sup>

<sup>a</sup> Department of Chemistry, University at Buffalo, The State University of New York, Buffalo, New York 14260, USA.

<sup>b</sup> Department of Chemical and Biological Engineering, University at Buffalo, The State University of New York, Buffalo, New York 14260, USA.

\* E-mail: trcook@buffalo.edu

#### Contents

|                                                                                        |    |
|----------------------------------------------------------------------------------------|----|
| Synthesis of PdMOP precursors .....                                                    | 2  |
| <sup>1</sup> H Nuclear Magnetic Resonance spectra of MOPs .....                        | 3  |
| Optical microscope images of the mixed-matrix membranes.....                           | 4  |
| Electron microscope images of the mixed matrix membranes .....                         | 5  |
| UV-Vis Spectra of MOPs and MOF-5 in their respective solvents .....                    | 6  |
| Summary of Powder X-ray diffraction peaks from diffractograms of PVDF and MOP/MOF..... | 8  |
| References.....                                                                        | 10 |

#### Tables

|                                                                                                                           |   |
|---------------------------------------------------------------------------------------------------------------------------|---|
| <b>Table S1.</b> Values of 2θ and respective d spacing observed in the diffractograms of PVDF powder and membranes ..     | 8 |
| <b>Table S2.</b> Values of 2θ and respective d spacing observed in the diffractograms of <b>CuMOP</b> powder and membrane | 8 |
| <b>Table S3.</b> Values of 2θ and respective d spacing observed in the diffractograms of <b>PdMOP</b> powder and membrane | 8 |
| <b>Table S4.</b> Values of 2θ and respective d spacing observed in the diffractograms of <b>FeMOP</b> powder and membrane | 8 |
| <b>Table S5.</b> Values of 2θ and respective d spacing observed in the diffractograms of MOF-5 powder and membrane .      | 9 |

## Synthesis of PdMOP precursors

**PdbpyCl<sub>2</sub>** was synthesized following a previously published procedure.<sup>1</sup> 1.773 g (10.0 mmol) PdCl<sub>2</sub> and 100 mL CH<sub>3</sub>CN were mixed and heated to 70°C for an hour. The hot solution was filtered into a 500-mL round bottom flask with 1.562 g (10.0 mmol) 2,2'-bpy in 200 mL CH<sub>3</sub>CN, then stirred overnight. The orange needle-like solid product was isolated (19.80 g, 83% yield) and washed with CH<sub>3</sub>CN and (CH<sub>3</sub>)<sub>2</sub>CO. <sup>1</sup>H NMR (400 MHz, DMSO-*d*<sub>6</sub>, 25°C): δ (ppm) = 9.14 (d, 2H, <sup>3</sup>J = 6.6 Hz, 3,3'-pyridine), 8.58 (d, 2H, <sup>3</sup>J = 7.9 Hz, 6,6'-pyridine), 8.36 (t, 2H, <sup>3</sup>J = 8.6 Hz, 4,4'-pyridine), 7.81 (t, 2H, <sup>3</sup>J = 7.3 Hz, 5,5'-pyridine).

**Pdbpy(ONO<sub>2</sub>)<sub>2</sub>** was synthesized using a previously published procedure.<sup>1</sup> 1.00 g (3.00 mmol) PdbpyCl<sub>2</sub> in 280 mL 1 M HNO<sub>3</sub> was heated to 70°C. Then 0.509 g (3.00 mmol) AgNO<sub>3</sub> dissolved in minimal amount of H<sub>2</sub>O was added to the mixture and stirred overnight. White AgCl solid precipitated immediately upon addition of AgNO<sub>3</sub>. The mixture was centrifuged, decanted, and filtered to remove the white solid. The crude product was isolated by solvent removal in vacuo. This solid was washed with 50-mL portions of CH<sub>3</sub>CN at least three times then dissolved in H<sub>2</sub>O. The pure yellow powder product was isolated (1.16 g) at quantitative yield after solvent removal in vacuo. <sup>1</sup>H NMR (400 MHz, D<sub>2</sub>O, 25°C): δ (ppm) = 8.36 (td, 2H, <sup>3</sup>J = 8.1 Hz, 3,3'-pyridine), 8.31 (m, 2H, 6,6'-pyridine), 8.27 (m, 2H, 4,4'-pyridine), 7.74 (ddd, 2H, <sup>3</sup>J = 7.5, 5.9, 1.7 Hz, 5,5'-pyridine).

**TPT** preparation was adapted from a previously published procedure.<sup>2, 3</sup> 1.0 g (3.8 mmol) 18-crown-6 and 0.225 g (4.0 mmol) KOH were dissolved in 5 mL CH<sub>3</sub>OH with stirring for 10 min. The solution was concentrated to remove CH<sub>3</sub>OH in a hood. To this oil, 10 g (96 mmol) of 4-cyanopyridine was added. The mixture was transferred into a 25 mL Teflon-lined stainless steel reactor and heated at 200°C for 7 h. After cooling to room temperature, the brown solid was washed with 50-mL portions of hot pyridine three times to give a white solid. The white solid was dissolved in 50 mL dilute HCl, reprecipitated with aqueous NH<sub>3</sub>, filtered, washed with 50 mL portions of CH<sub>3</sub>CN at least three times, then dried in a vacuum oven at 80°C overnight to afford 25% yield (2.5 g). <sup>1</sup>H NMR (300 MHz, CD<sub>2</sub>Cl<sub>2</sub>, 25°C): δ (ppm) = 8.93 (d, 6H, <sup>3</sup>J = 5.3 Hz, pyridine H<sup>α</sup>), 8.60 (d, 6H, <sup>3</sup>J = 5.8 Hz, pyridine H<sup>β</sup>).

# <sup>1</sup>H Nuclear Magnetic Resonance spectra of MOPs

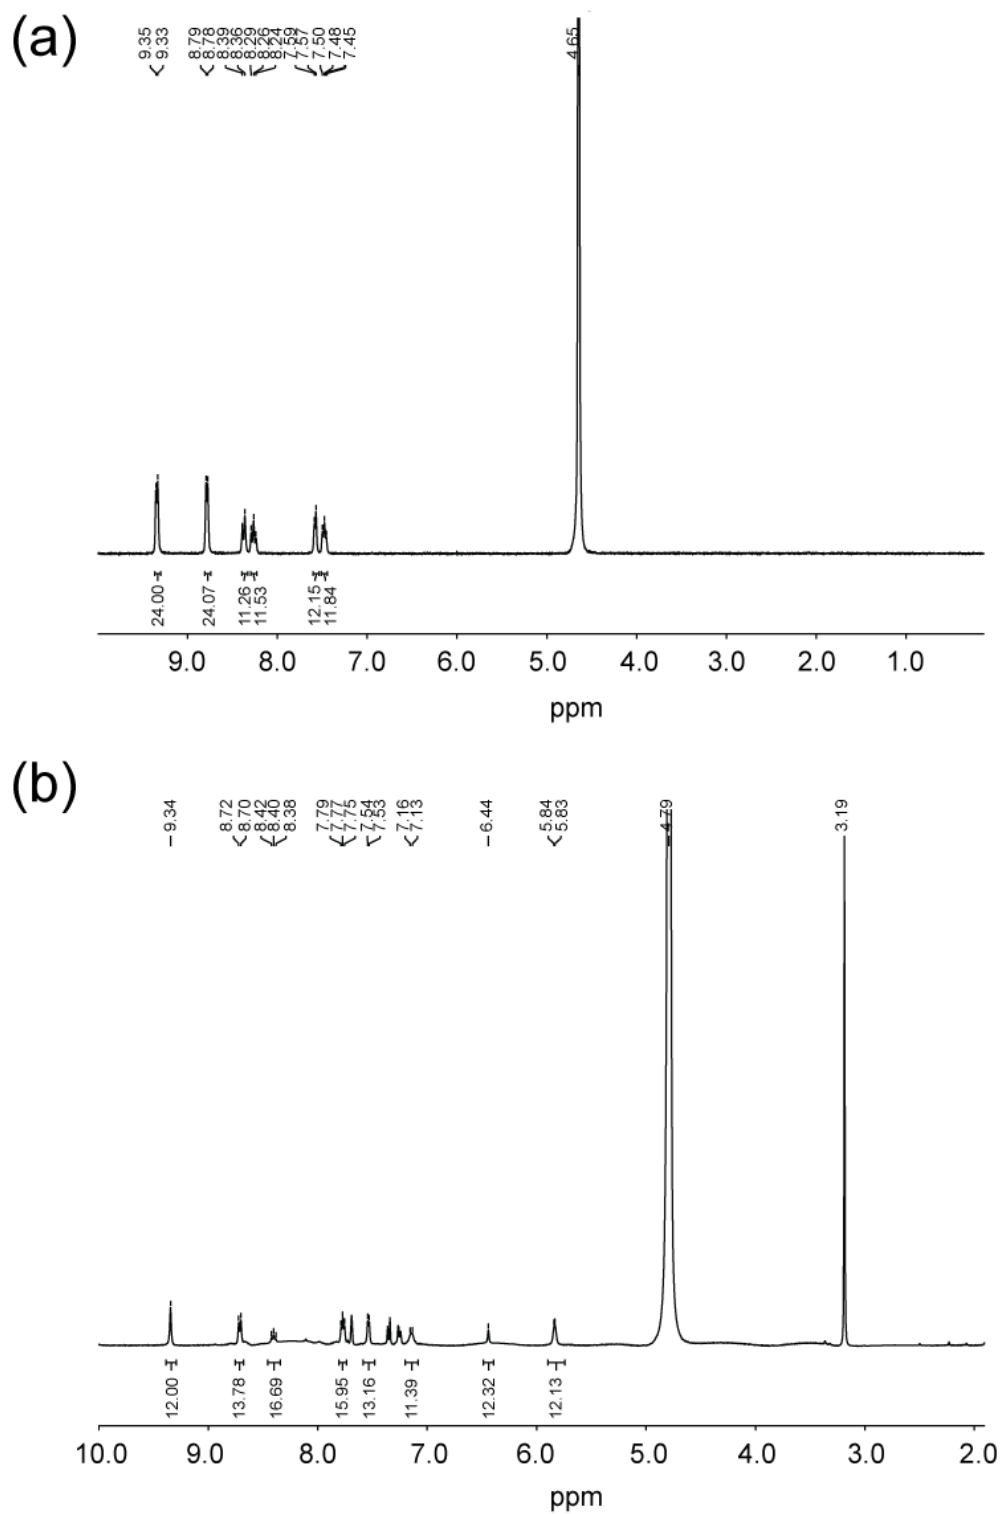

Figure S1. <sup>1</sup>H NMR spectra of (a) **PdMOP** in D<sub>2</sub>O and (b) **FeMOP** in DMSO-d<sub>6</sub>.

# Optical microscope images of the mixed-matrix membranes

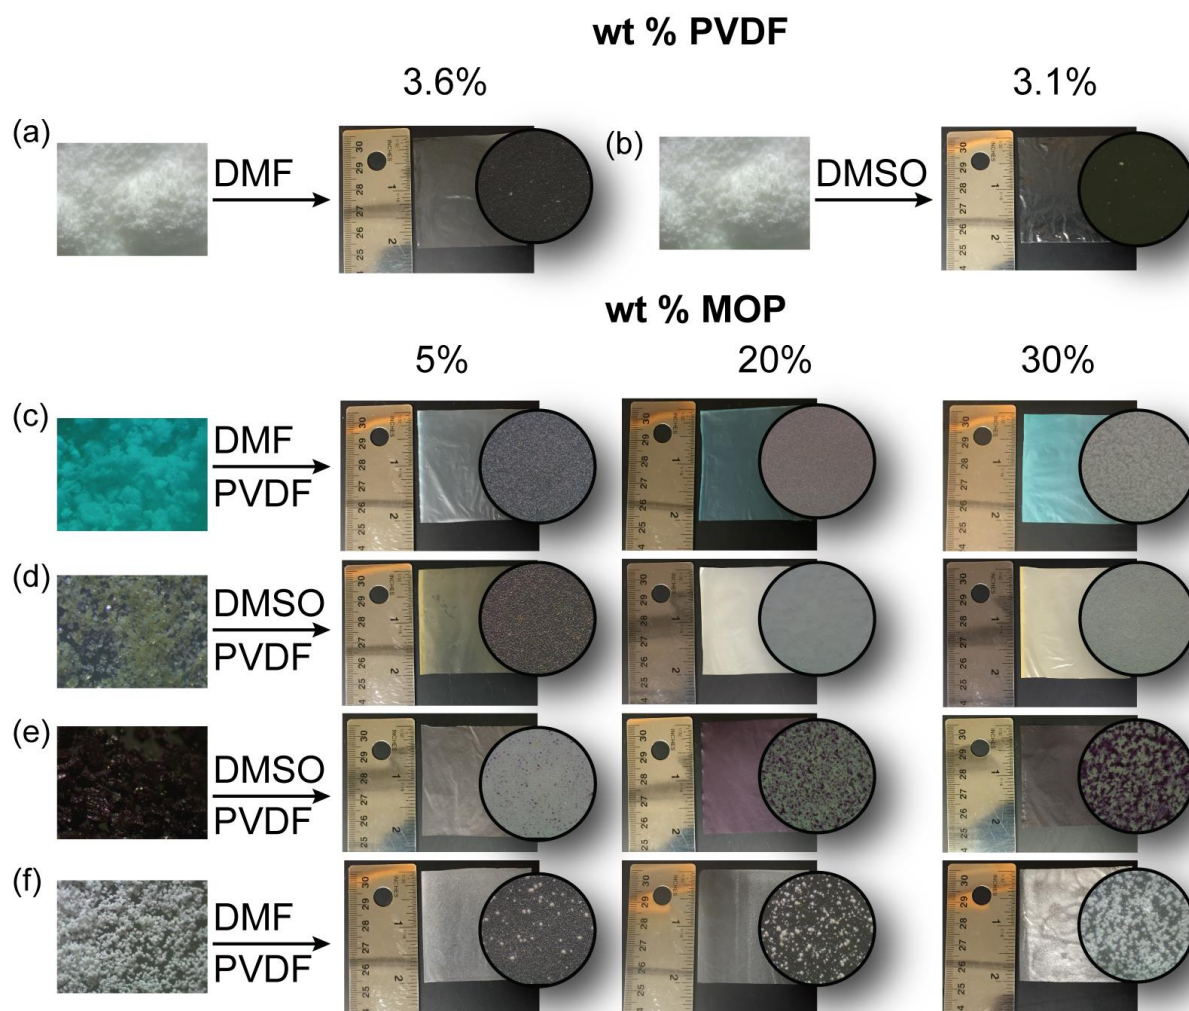

**Figure S2.** Optical microscope images at 5.0 magnification of polymer and MOP/MOF membranes: (a) PVDF in DMF; (b) PVDF in DMSO; (c) **CuMOP**; (d) **PdMOP**; (e) **FeMOP**; and (f) **MOF-5**.

## Electron microscope images of the mixed matrix membranes

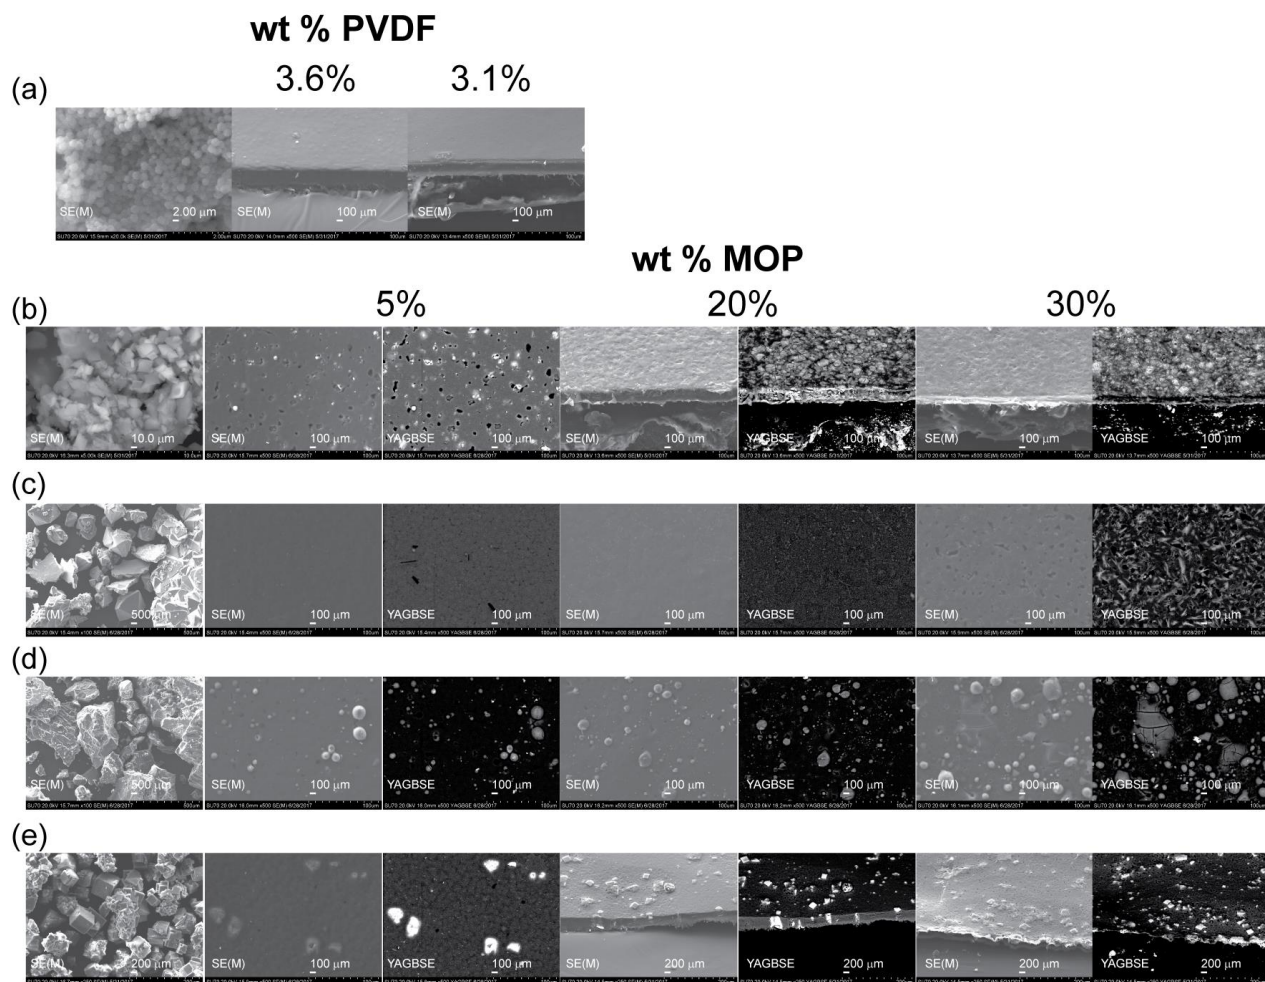

**Figure S3.** Electron microscope images: (a) SEM of PVDF powder and membranes in DMF and DMSO; (b) SEM/YAGBSE of **CuMOP** powder and membrane; (c) SEM/YAGBSE of **PdMOP** powder and membrane; (d) SEM/YAGBSE of **FeMOP** powder and membrane; and (e) SEM/YAGBSE of **MOF-5** powder and membrane.

# UV-Vis Spectra of MOPs and MOF-5 in their respective solvents

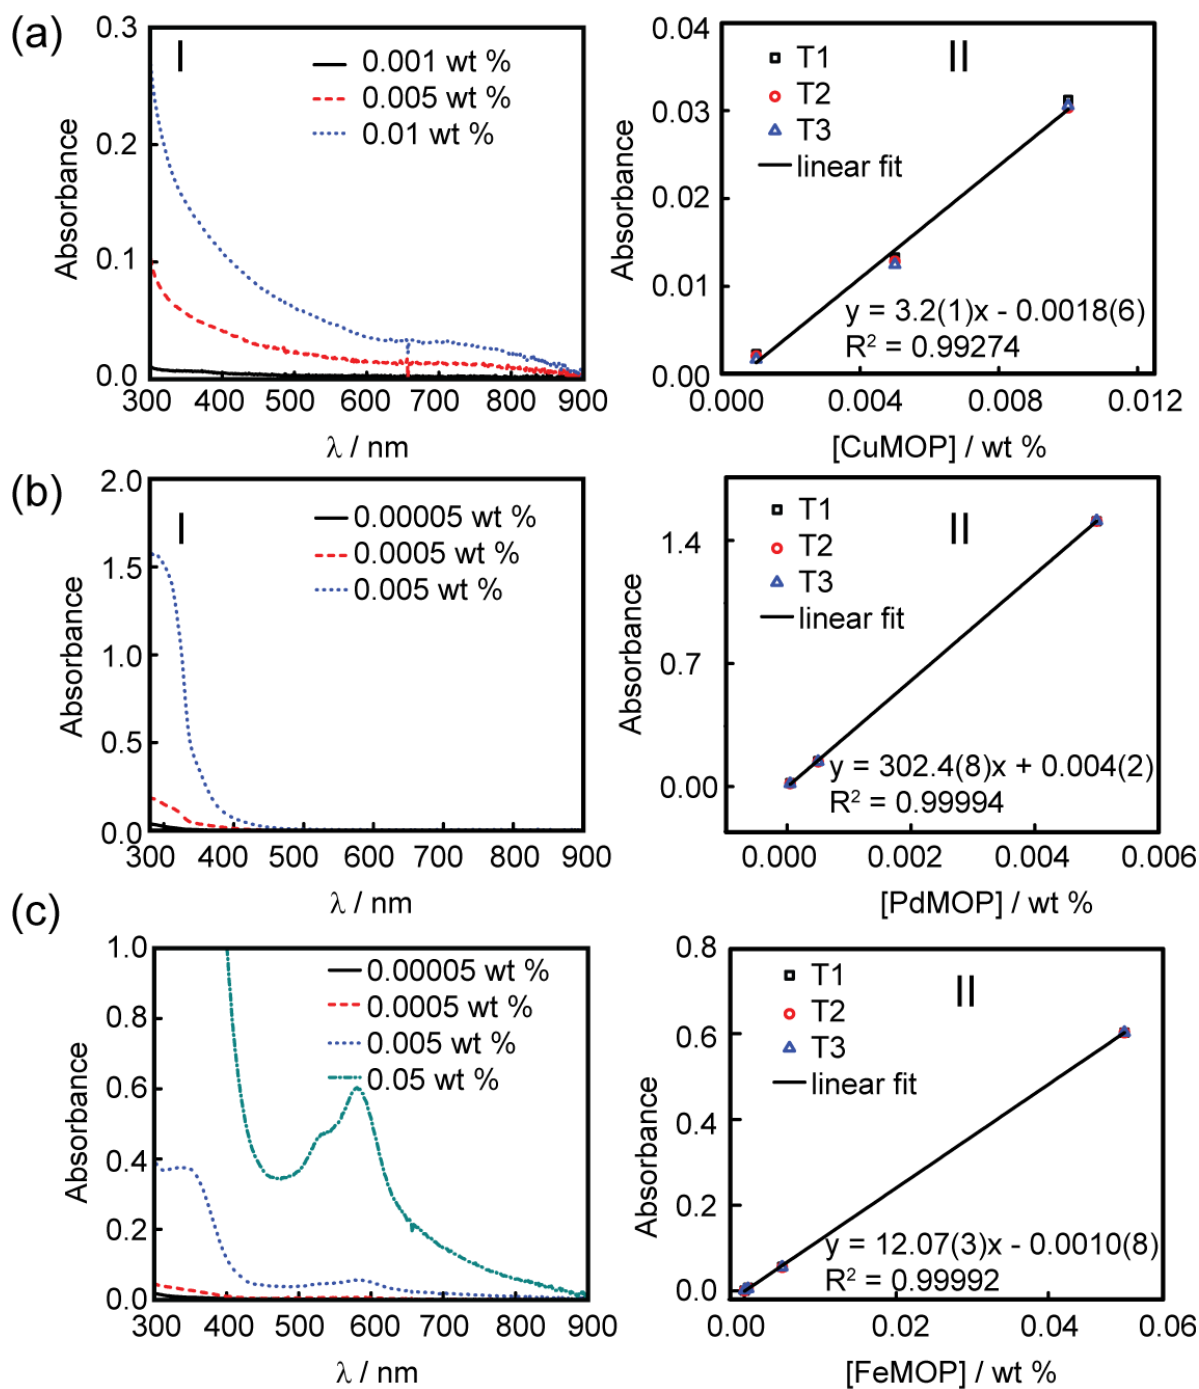

**Figure S4.** (I) UV-Vis spectra and (II) calibration curves for solubility determination of (a) **CuMOP** in DMF; (b) **PdMOP** in DMSO; and (c) **FeMOP** in DMSO.

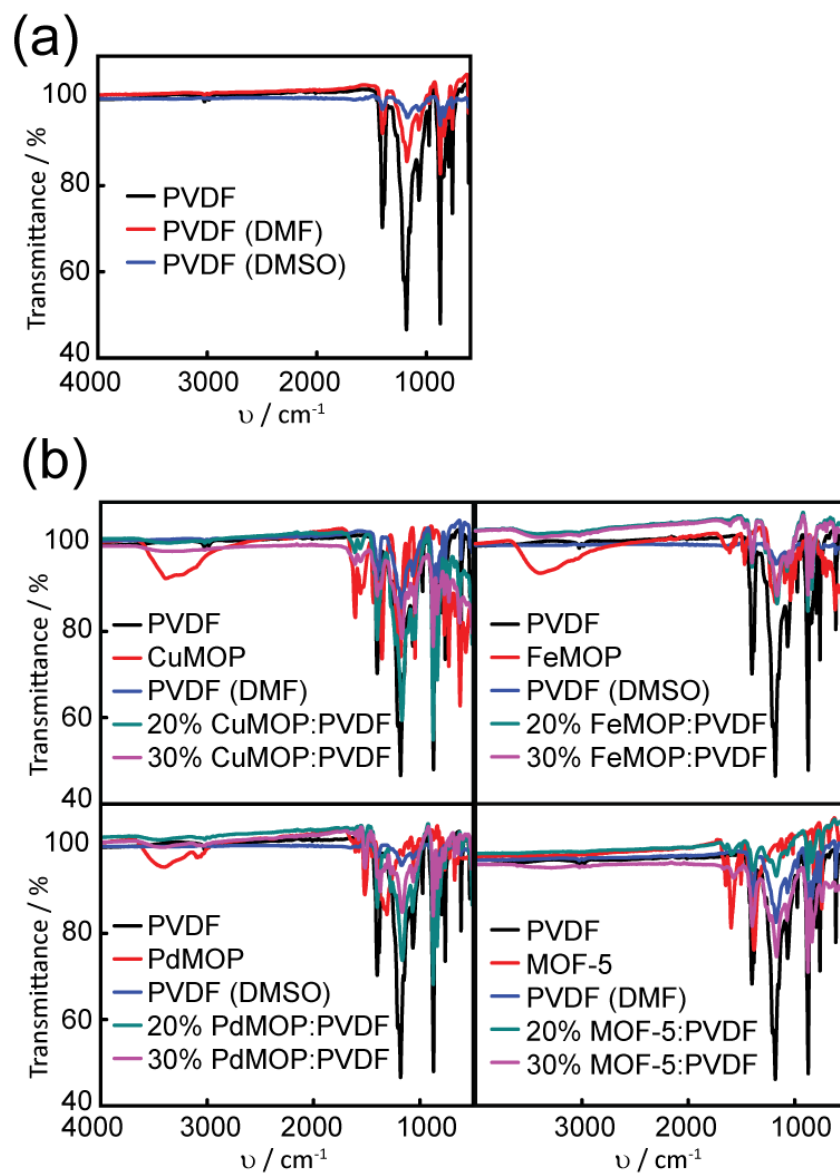

**Figure S5.** FT-IR spectra of (a) PVDF powder and membranes and (b) filler powders and membranes (**CuMOP**, **PdMOP**, **FeMOP**, and **MOF-5**).

## Summary of Powder X-ray diffraction peaks from diffractograms of PVDF and MOP/MOF

**Table S1.** Values of  $2\theta$  and respective d spacing observed in the diffractograms of PVDF powder and membranes

| Material         | $2\theta$ | $d, \text{\AA}$ | PVDF phase |
|------------------|-----------|-----------------|------------|
| PVDF powder      | 18.34     | 4.833           | $\alpha$   |
|                  | 19.90     | 4.459           |            |
|                  | 26.80     | 3.324           |            |
| PVDF film (DMF)  | 18.61     | 4.763           | $\alpha$   |
|                  | 19.99     | 4.437           |            |
|                  | 26.48     | 3.363           |            |
| PVDF film (DMSO) | 20.59     | 4.311           | $\beta$    |

**Table S2.** Values of  $2\theta$  and respective d spacing observed in the diffractograms of CuMOP powder and membrane

| Material             | $2\theta$ | $d, \text{\AA}$ | PVDF phase |
|----------------------|-----------|-----------------|------------|
| CuMOP powder         | 11.03     | 8.018           | -          |
|                      | 11.82     | 7.484           |            |
|                      | 12.67     | 6.984           |            |
|                      | 13.51     | 6.549           |            |
|                      | 15.37     | 5.760           |            |
|                      | 16.92     | 5.236           |            |
|                      | 18.43     | 4.811           |            |
|                      | 18.99     | 4.669           |            |
|                      | 19.51     | 4.547           |            |
|                      | 20.32     | 4.366           |            |
|                      | 21.38     | 4.153           |            |
|                      | 23.60     | 3.766           |            |
|                      | 24.22     | 3.672           |            |
|                      | 26.18     | 3.401           |            |
|                      | 29.55     | 3.020           |            |
| CuMOP film (20 wt %) | 30.37     | 2.941           | $\beta$    |
|                      | 20.62     | 4.304           |            |

**Table S3.** Values of  $2\theta$  and respective d spacing observed in the diffractograms of FeMOP powder and membrane

| Material             | $2\theta$ | $d, \text{\AA}$ | PVDF phase |
|----------------------|-----------|-----------------|------------|
| FeMOP powder         | 9.48      | 9.321           | -          |
|                      | 10.49     | 8.426           |            |
|                      | 16.07     | 5.509           |            |
|                      | 23.56     | 3.772           |            |
| FeMOP film (20 wt %) | 20.49     | 4.331           | $\beta$    |

**Table S4.** Values of  $2\theta$  and respective d spacing observed in the diffractograms of PdMOP powder and membrane

| Material             | $2\theta$ | $d, \text{\AA}$ | PVDF phase |
|----------------------|-----------|-----------------|------------|
| PdMOP powder         | 9.96      | 8.876           | -          |
|                      | 14.25     | 6.210           |            |
|                      | 23.59     | 3.769           |            |
|                      | 27.84     | 3.202           |            |
| PdMOP film (20 wt %) | 20.61     | 4.306           | $\beta$    |

**Table S5.** Values of  $2\theta$  and respective d spacing observed in the diffractograms of MOF-5 powder and membrane

| Material             | $2\theta$ | $d, \text{\AA}$ | PVDF phase |
|----------------------|-----------|-----------------|------------|
| MOF-5 powder         | 5.84      | 15.132          | -          |
|                      | 6.80      | 12.982          |            |
|                      | 8.79      | 10.054          |            |
|                      | 9.52      | 9.282           |            |
|                      | 9.75      | 9.064           |            |
|                      | 11.34     | 7.800           |            |
|                      | 12.11     | 7.304           |            |
|                      | 13.67     | 6.470           |            |
|                      | 14.67     | 6.035           |            |
|                      | 15.42     | 5.743           |            |
|                      | 16.66     | 5.316           |            |
|                      | 17.64     | 5.024           |            |
|                      | 17.95     | 4.938           |            |
|                      | 18.51     | 4.789           |            |
|                      | 19.15     | 4.632           |            |
|                      | 20.04     | 4.428           |            |
|                      | 20.59     | 4.310           |            |
|                      | 22.40     | 3.965           |            |
|                      | 23.17     | 3.836           |            |
|                      | 24.24     | 3.668           |            |
|                      | 24.56     | 3.621           |            |
|                      | 24.92     | 3.569           |            |
|                      | 25.54     | 3.485           |            |
|                      | 26.48     | 3.364           |            |
|                      | 28.88     | 3.089           |            |
|                      | 29.69     | 3.006           |            |
|                      | 31.23     | 2.862           |            |
|                      | 31.62     | 2.827           |            |
|                      | 32.15     | 2.782           |            |
|                      | 32.74     | 2.733           |            |
|                      | 34.70     | 2.583           |            |
| MOF-5 film (20 wt %) | 8.82      | 10.014          | $\beta$    |
|                      | 20.12     | 4.410           |            |

## References

1. S. Wimmer, P. Castan, F. L. Wimmer and N. P. Johnson, *J. Chem. Soc., Dalton Trans.*, 1989, DOI: 10.1039/DT9890000403, 403-412.
2. H. L. Anderson, S. Anderson and J. K. M. Sanders, *J. Chem. Soc., Perkin Trans. 1*, 1995, DOI: 10.1039/P19950002231, 2231-2245.
3. M.-X. Li, Z.-X. Miao, M. Shao, S.-W. Liang and S.-R. Zhu, *Inorg. Chem.*, 2008, **47**, 4481-4489.
